# Supplementary material for: Transmission Electron Microscopy Reveals Propionic Acid-induced Alterations to Mitochondrial Morphology in SH-SY5Y Cells
Source: Preprints.org preprint supplement (doi:10.20944/preprints202211.0553.v1), 2022-11-30
Supplement: Supplementary file 1 [file supplementary]

## Sheet: Sheet1
Gene	Primer sequence (5’-3’)	Probe sequence (5’-3’)	Fluorescent dye:Quencher	Reference
DRP1	F: TCAACCTCCGCGTCTACTC	CGTGCTGAACCTGACCCTGGT	FAM:BHQ-1	Kosmider et al., 2019
	R: GATCTGGAACTCGATGTCGGG
MFN1	F: GAGGTGCTATCTCGGAGACAC	GGCAGGACAAGCAGTGGGAAGA	Cy5:BMN-Q620 3'
	R: GCCAATCCCACTAGGGAGAAC
MFN2	F: TGGCTCAAGACTATAAGCTGCG	AGATTACGGAGGAAGTGGAGAGGCA	HEX:BHQ-1	Duraisamy, Mohammad and Renu., 2019
	R: GAGGACTACTGGAGAAGGGTGG
NFE2L2	F: GAGAGCCCAGTCTTGGAAC	TCGCTCAGTTACAACTAGATGAAGAGA	HEX:BHQ-1	Schrier et al., 2022
	R: TTGGCTTCTGGACTTGGAAC
NRF1	F: TTGAGTCTAATCCATCTATCCG	TCGGAAACTTCGAGCCACGTTAGA	Cy5:BMN-Q620 3'	Pinho et al., 2022
	R: TACTTACGCACCACATTCTC
TFAM	F: GTCACTGCCTCATCCACC	AAGGTCTGGAGCAGAGCTGTGC	FAM:BHQ-1	Ye et al., 2022
	R: CCGCCCTATAAGCATCTT
STOML2	F: GTGACTCTCGACAATGTAAC	N/A	N/A	Hu et al., 2018
	R: TGATCTCATAACGGAGGCAG
B2M	F: CCAGCAGAGAATGGAAAGTCAA	ATGTGTCTGGGTTTCATCCATCCGACA	CAL Fluor red 610:BHQ-2	Grady et al., 2014
	R: TCTCTCTCCATTCTTCAGTAAGTCAACT
